# Supplementary material for: Four coordination polymers based on dinuclear and trinuclear units with a new multifunctional pyridyl-dicarboxylate ligand: luminescence and magnetic properties
Source: Royal Society of Chemistry journal article supplement (doi:10.1039/c7ce01042g), 2017-01-01
Supplement: c7ce01042g1.pdf [file c7ce01042g1.pdf]

**Four coordination polymers based on dinuclear and trinuclear units with new multifunctional pyridyl-dicarboxylate ligands: luminescence and magnetic properties**

*Feng Liu,<sup>a</sup> Wei Gao,<sup>a</sup> Xiu-Mei Zhang,<sup>\*a</sup> Jie-Ping Liu<sup>a</sup> and En-Qing Gao<sup>b</sup>*

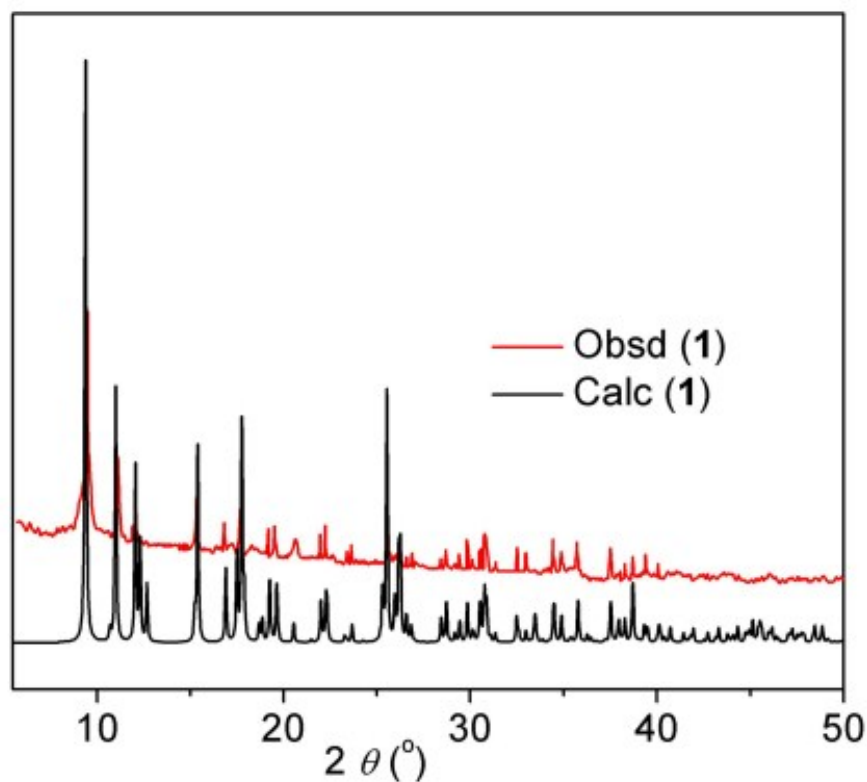

**Fig. S1.** PXRD patterns for **1** (simulated: black; experimental: red).

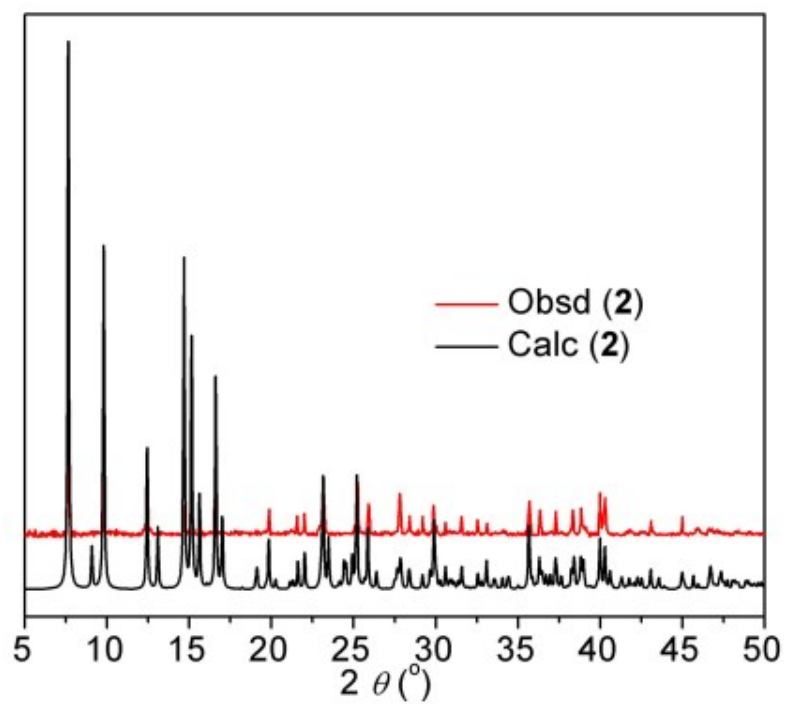

**Fig. S2.** PXRD patterns for **2** (simulated: black; experimental: red).

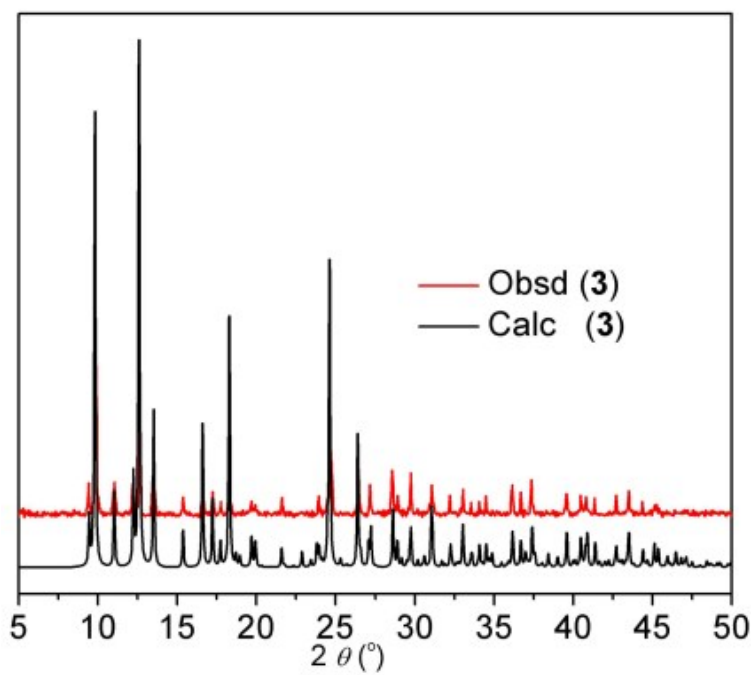

**Fig. S3.** PXRD patterns for **3** (simulated: black; experimental: red).

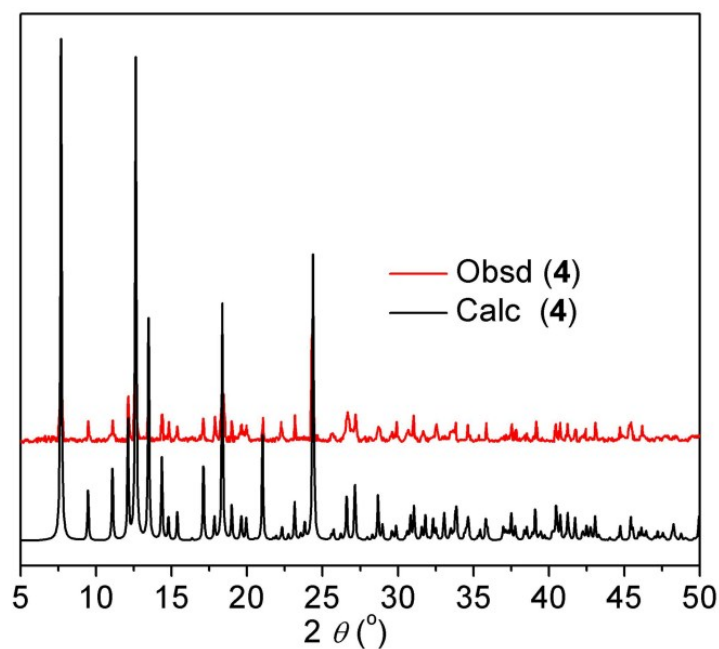

**Fig. S4.** PXRD patterns for **4** (simulated: black; experimental: red).

Table S1 Selected bond lengths [ $\text{\AA}$ ] and angles [ $^\circ$ ] for **1** - **4**.

| Compound <b>1</b>                           |            |             |            |
|---------------------------------------------|------------|-------------|------------|
| Zn1-O5A                                     | 1.9639(16) | Zn1-O1      | 1.9787(16) |
| Zn1-N1B                                     | 2.0471(19) | Zn1-O3      | 2.084(2)   |
| Zn1-O1C                                     | 2.4582(18) |             |            |
| O5A-Zn1-O1                                  | 123.13(7)  | O5A-Zn1-N1B | 113.71(8)  |
| O1-Zn1-N1B                                  | 118.98(7)  | O5A-Zn1-O3  | 96.00(8)   |
| O1-Zn1-O3                                   | 97.76(8)   | N1B-Zn1-O3  | 96.62(9)   |
| O5A-Zn1-O3C                                 | 86.08(7)   | O1-Zn1-O1C  | 75.05(7)   |
| N1B-Zn1-O1C                                 | 89.21(7)   | O3-Zn1-O1C  | 172.38(8)  |
| A x, y-1, z; B x-1, y-1, z-1; C -x, -y, -z. |            |             |            |
| Compound <b>2</b>                           |            |             |            |
| Mn1-O4A                                     | 2.101(2)   | Mn1-O5      | 2.140(3)   |
| Mn1-N1B                                     | 2.213(2)   | Mn1-O2      | 2.230(2)   |
| Mn1-O1                                      | 2.420(2)   | Mn1-Cl1     | 2.5331(10) |
| Mn2-O3A                                     | 2.109(2)   | Mn2-O1      | 2.200(2)   |
| Mn2-Cl1                                     | 2.5957(8)  |             |            |

|             |            |              |            |
|-------------|------------|--------------|------------|
| O4A-Mn1-O5  | 89.05(11)  | O4A-Mn1-N1B  | 109.87(9)  |
| O5-Mn1-N1B  | 98.93(10)  | O4A-Mn1-O2   | 157.88(8)  |
| O5-Mn1-O2   | 86.67(10)  | N1B-Mn1-O2   | 92.23(8)   |
| O4A-Mn1-O1  | 101.73(7)  | O5-Mn1-O1    | 84.34(9)   |
| N1B-Mn1-O1  | 148.24(8)  | O2-Mn1-O1    | 56.26(7)   |
| O4A-Mn1-Cl1 | 88.61(7)   | O5-Mn1-Cl1   | 165.65(8)  |
| N1B-Mn1-Cl1 | 95.18(7)   | O2-Mn1-Cl1   | 90.19(7)   |
| O1-Mn1-Cl1  | 82.28(6)   | O3C-Mn2-O3   | 180.00(10) |
| O3C-Mn2-O1D | 86.68(8)   | O3A-Mn2-O1   | 93.32(8)   |
| O1D-Mn2-O1  | 180.00(10) | O3C-Mn2-Cl1  | 90.27(6)   |
| O3A-Mn2-Cl1 | 89.73(6)   | O1D-Mn2-Cl1  | 94.76(5)   |
| O1-Mn2-Cl1  | 85.24(5)   | Cl1-Mn2-Cl1D | 180.0      |

A  $x-1/2, -y+3/2, -z+1$ ; B  $x, -y+3/2, z-1/2$ ; C  $-x+3/2, y-1/2, z$ ; D  $-x+1, -y+1, -z+1$ .

---

**Compound 3**

---

|             |            |             |            |
|-------------|------------|-------------|------------|
| Co1-O1      | 2.260(3)   | Co1-O3      | 2.180(3)   |
| Co1-O2      | 2.170(3)   | Co1-N1B     | 2.107(4)   |
| Co1-O8      | 2.062(4)   | Co1-O6A     | 2.040(3)   |
| Co2-O7A     | 1.974(3)   | Co2-O2      | 2.105(3)   |
| Co2-O3      | 2.251(3)   |             |            |
| O6A-Co1-O8  | 87.57(14)  | O6A-Co1-N1B | 111.90(13) |
| O8-Co1-N1B  | 89.77(15)  | O6A-Co1-O2  | 95.47(11)  |
| O8-Co1-O2   | 96.35(14)  | O1B-Co1-O2  | 152.20(12) |
| O6A-Co1-O3  | 85.11(12)  | O8-Co1-O3   | 170.81(14) |
| N1B-Co1-O3  | 98.11(14)  | O2-Co1-O3   | 78.86(11)  |
| O6A-Co1-O1  | 152.34(12) | O8-Co1-O1   | 86.01(14)  |
| N1B-Co1-O1  | 94.96(12)  | O2-Co1-O1   | 58.66(10)  |
| O3-Co1-O1   | 97.94(12)  | O7A-Co2-O2  | 88.16(11)  |
| O7A-Co2-O7C | 180.000(1) | O7C-Co2-O2  | 91.84(11)  |
| O2D-Co2-O2  | 180.00(13) | O7A-Co2-O3D | 86.69(12)  |

|             |            |             |            |
|-------------|------------|-------------|------------|
| O7C-Co2-O3D | 93.31(12)  | O2D-Co2-O3D | 78.65(11)  |
| O2-Co2-O3D  | 101.35(11) | O7A-Co2-O3  | 93.31(12)  |
| O7C-Co2-O3  | 86.69(12)  | O2D-Co2-O3  | 101.35(11) |
| O2-Co2-O3   | 78.65(11)  | O3D-Co2-O3  | 180.0      |

A  $x+1/2, -y+3/2, z+1/2$ ; B  $x, y+1, z$ ; C  $-x, y, -z-1/2$ ; D  $-x+1/2, -y+3/2, -z$ .

Compound 4

|            |            |             |            |
|------------|------------|-------------|------------|
| Ni1-O6A    | 2.020(2)   | Ni1-O8      | 2.033(3)   |
| Ni1-N1B    | 2.088(3)   | Ni1-O3      | 2.095(3)   |
| Ni1-O1     | 2.161(2)   | Ni1-O2      | 2.173(2)   |
| Ni2-O7A    | 1.967(2)   | Ni2-O2      | 2.071(2)   |
| Ni2-O3     | 2.149(2)   |             |            |
| O6A-Ni1-O8 | 87.80(11)  | O6A-Ni1-N1B | 105.58(10) |
| O8-Ni1-N1B | 89.90(12)  | O6A-Ni1-O3  | 85.77(10)  |
| O8-Ni1-O3  | 169.51(10) | N1B-Ni1-O3  | 99.81(11)  |
| O6A-Ni1-O1 | 157.07(9)  | O8-Ni1-O1   | 87.66(10)  |
| N1B-Ni1-O1 | 96.87(10)  | O3-Ni1-O1   | 95.06(9)   |
| O6A-Ni1-O2 | 97.47(9)   | O8-Ni1-O2   | 93.13(11)  |
| O1B-Ni1-O2 | 156.84(10) | O3-Ni1-O2   | 79.52(9)   |
| O1-Ni1-O2  | 60.38(8)   | O7A-Ni2-O7C | 180.000(1) |
| O7C-Ni2-O2 | 91.62(9)   | O7A-Ni2-O2  | 88.38(9)   |
| O2-Ni2-O2D | 180.00(12) | O7C-Ni2-O3  | 87.13(9)   |
| O7A-Ni2-O3 | 92.87(9)   | O3-Ni2-O2   | 80.61(9)   |
| O2D-Ni2-O3 | 99.39(9)   | O3-Ni2-O3D  | 180.00(4)  |
| O1-Ni2-O2  |            | O1-Ni2-O2   |            |

A  $x, -y, z+1/2$ ; B  $x, y+1, z$ ; C  $-x+2, y, -z+1/2$ ; D  $-x+2, -y, -z+1$ .

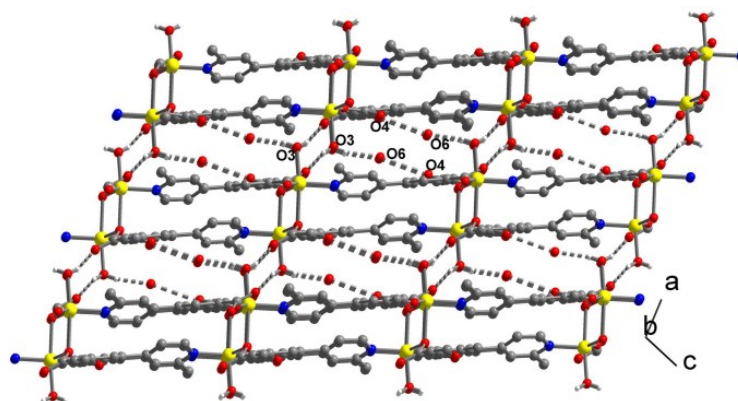

**Fig. S5** The 3D structure assembled through hydrogen bonding interactions in **1**.

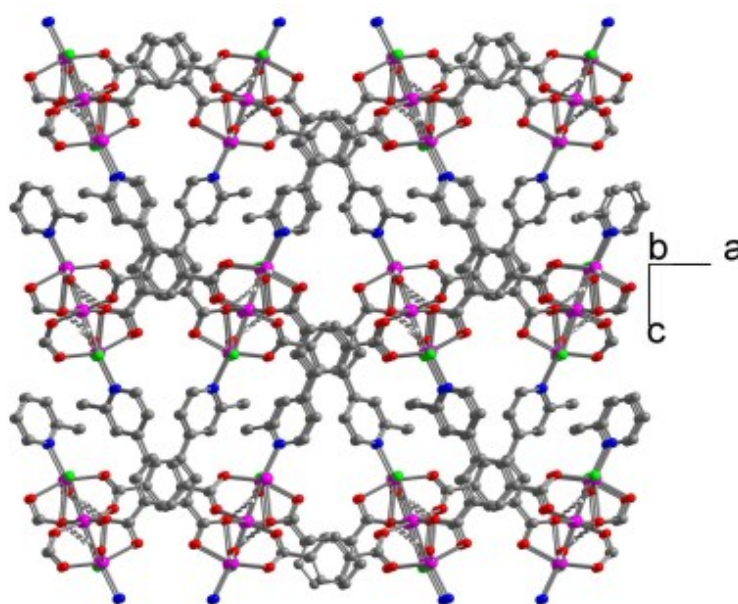

**Fig. S6** Views of the 3D structure of **2**.

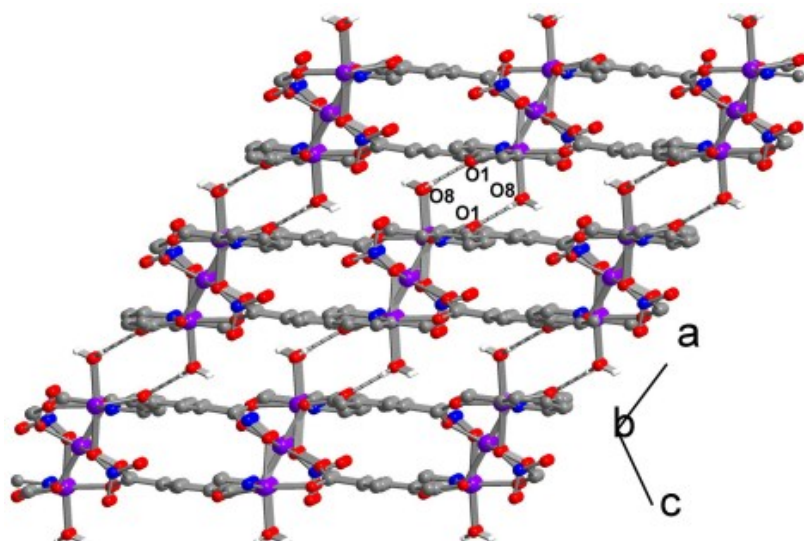

**Fig. S7** The 3D packing of the layers in **3**.

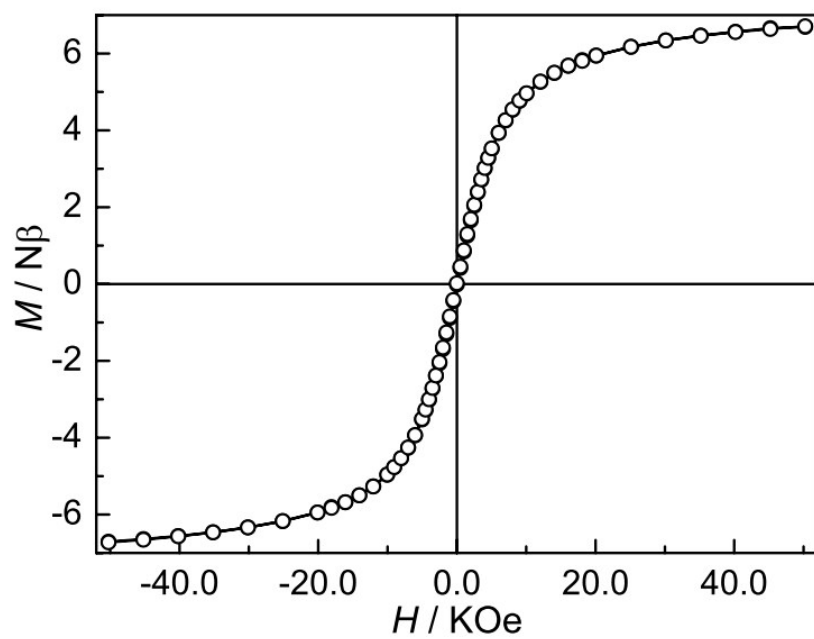

**Fig. S8** Isothermal magnetization of **3** at 2 K.

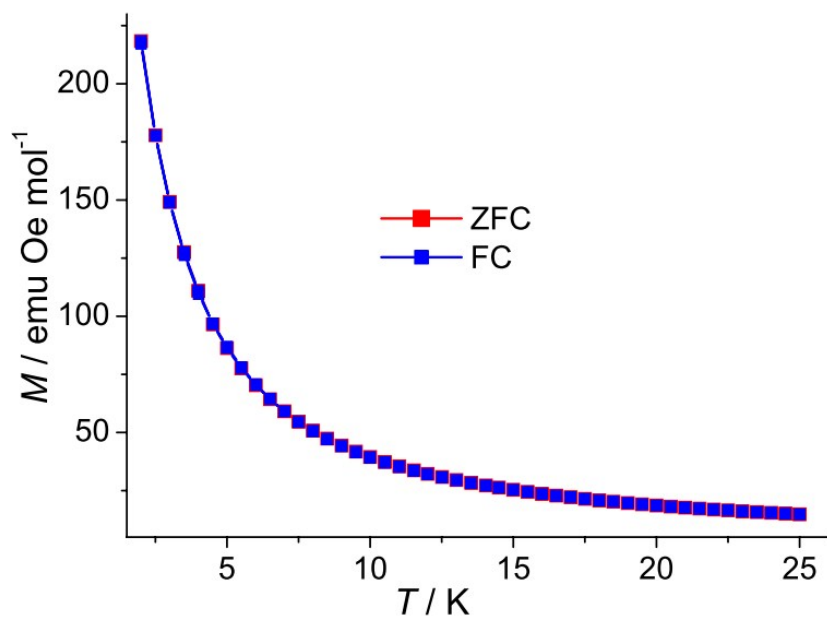

**Fig. S9** The FC/ZFC curves at low temperature for **3**.

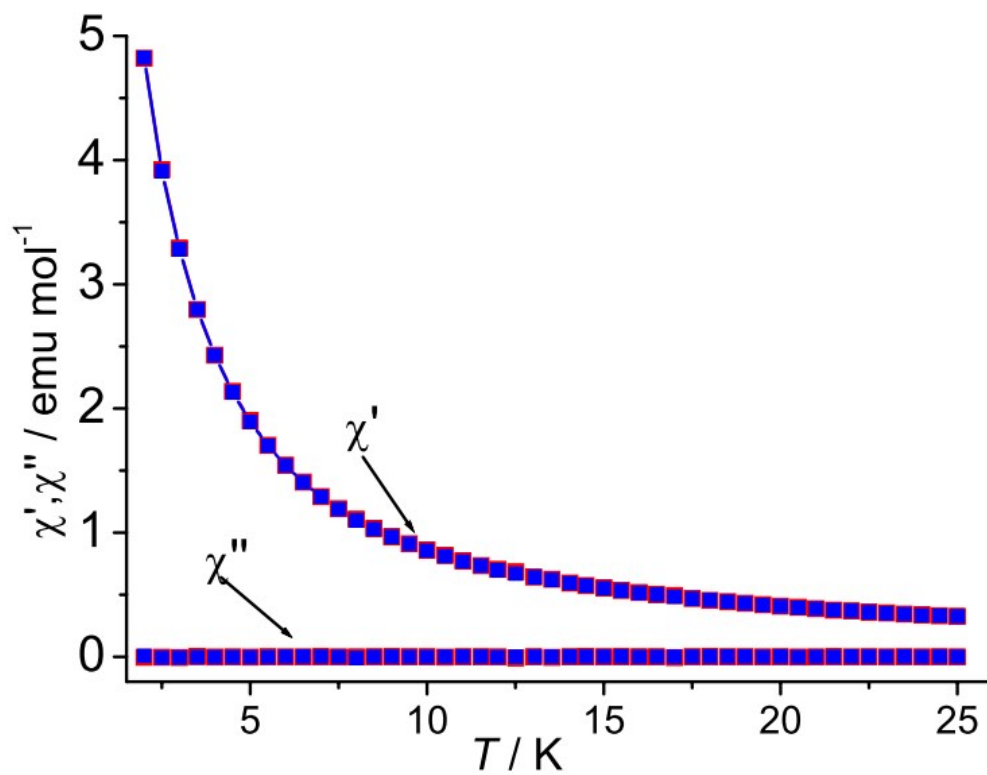

**Fig. S10**  $\chi'(T)$  and  $\chi''(T)$  plots for **3** at frequencies of 10, 100 Hz with  $H_{dc} = 0$  and  $H_{ac} = 3$  Oe.
